# Supplementary material for: Interactions and Stability of Gut Microbiota in Zebrafish Increase with Host Development
Source: PubMed Central journal article supplement (PMC9045336; doi:10.1128/spectrum.01696-21), 2022-03-21
Supplement: spectrum01696-21_supp_1_seq11.pdf [file spectrum01696-21_supp_1_seq11.pdf]

## Supplemental Material

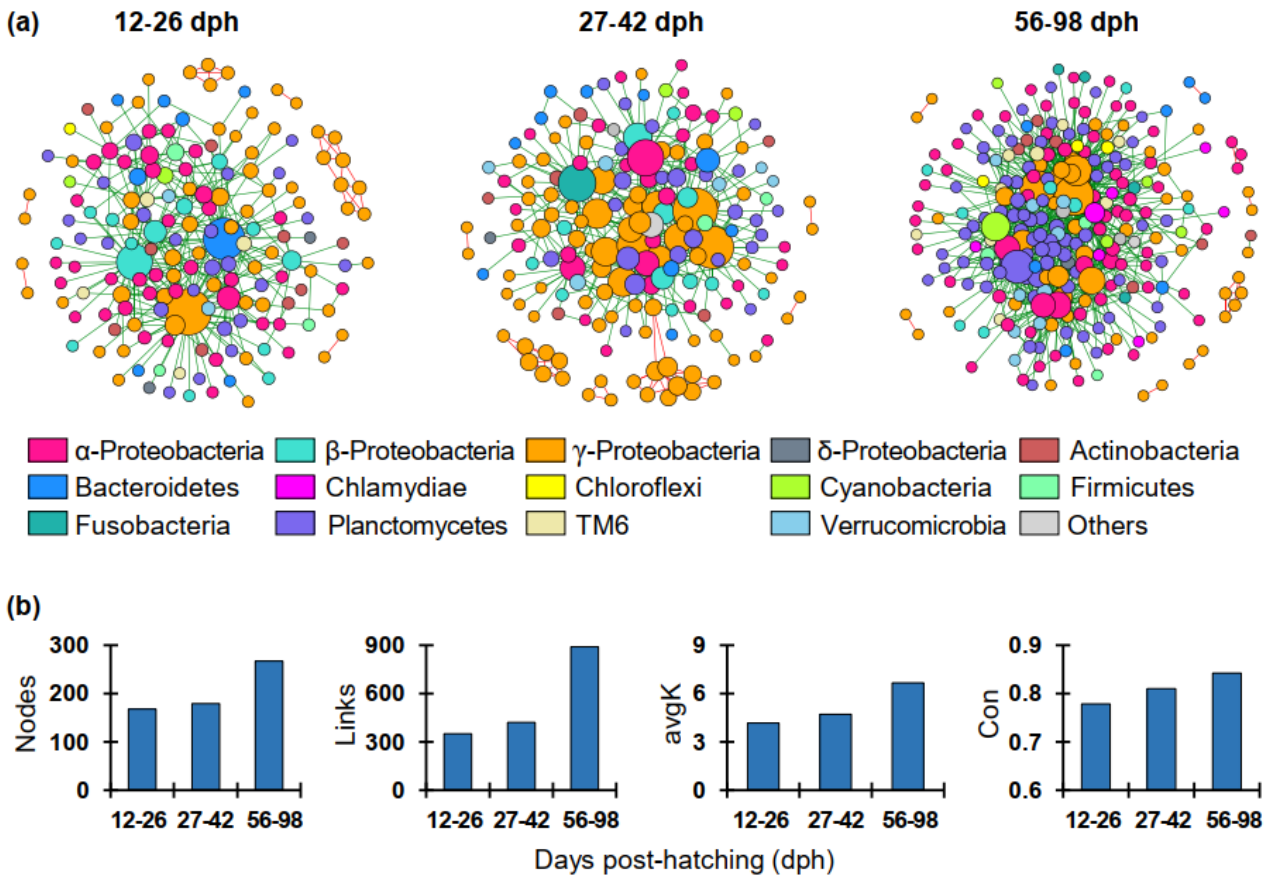

**Fig S1** Succession of gut microbial networks over zebrafish developmental stages. (a) Visualization of the constructed stage-dependent networks showing the node interactions with emphasize on the taxonomy and node degree of different OTUs. Each node represents an OTU and the node degree as indicated by the size represents the strength of connections among OTUs, and colors of nodes indicate phyla (Proteobacteria further divided into class). Red and green links indicate positive and negative correlations, respectively. Details of network topological attributes are summarized in Table S2. (b) Stage-dependent changes of network topology including nodes, links, average degree (avgK), and the connectedness (Con).

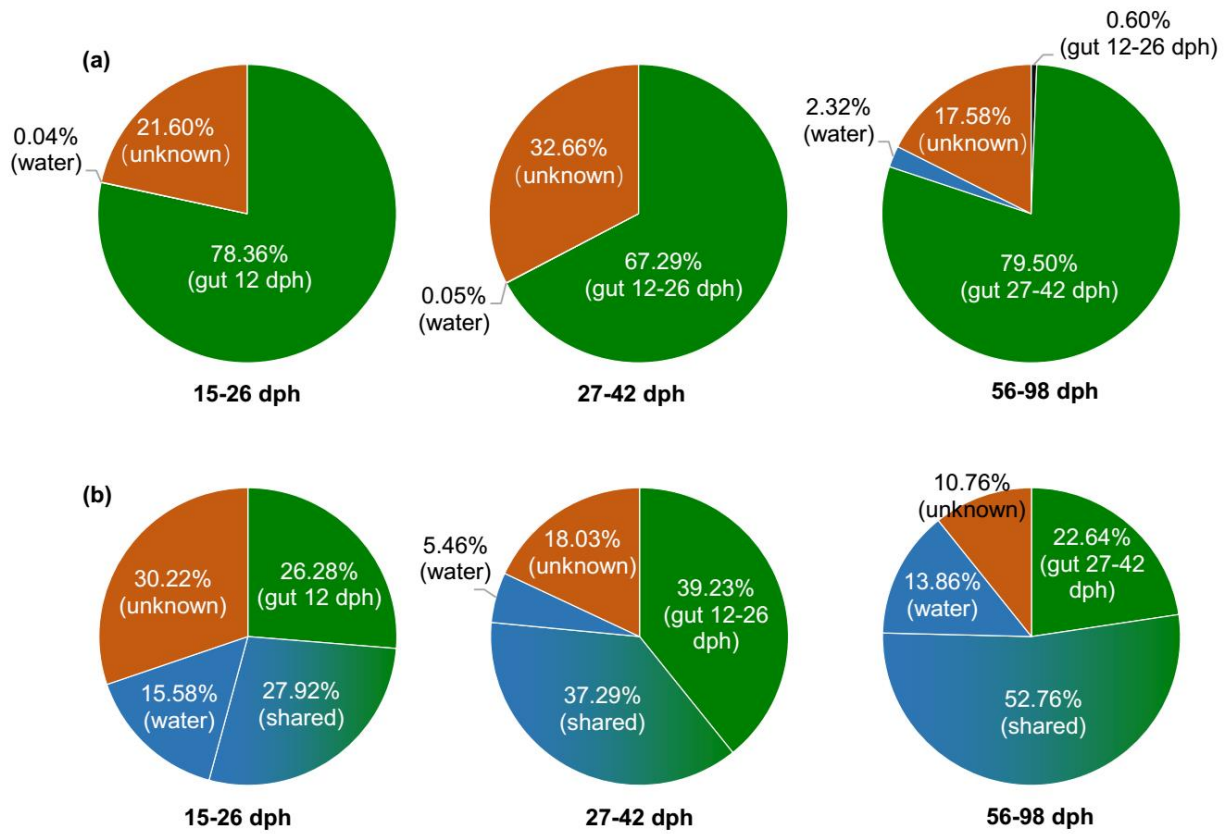

**Fig S2** Microbial sources of zebrafish gut microbiota. (a) SourceTracker proportion estimates for a subset of sink at each developmental stage. Water microbiota and gut microbiota of the adjacent previous stage were used as sources. (b) Percentage of OTUs that come from different sources. The shared (indicated by mixed colours) means the OTUs are shared by water and gut microbiota.

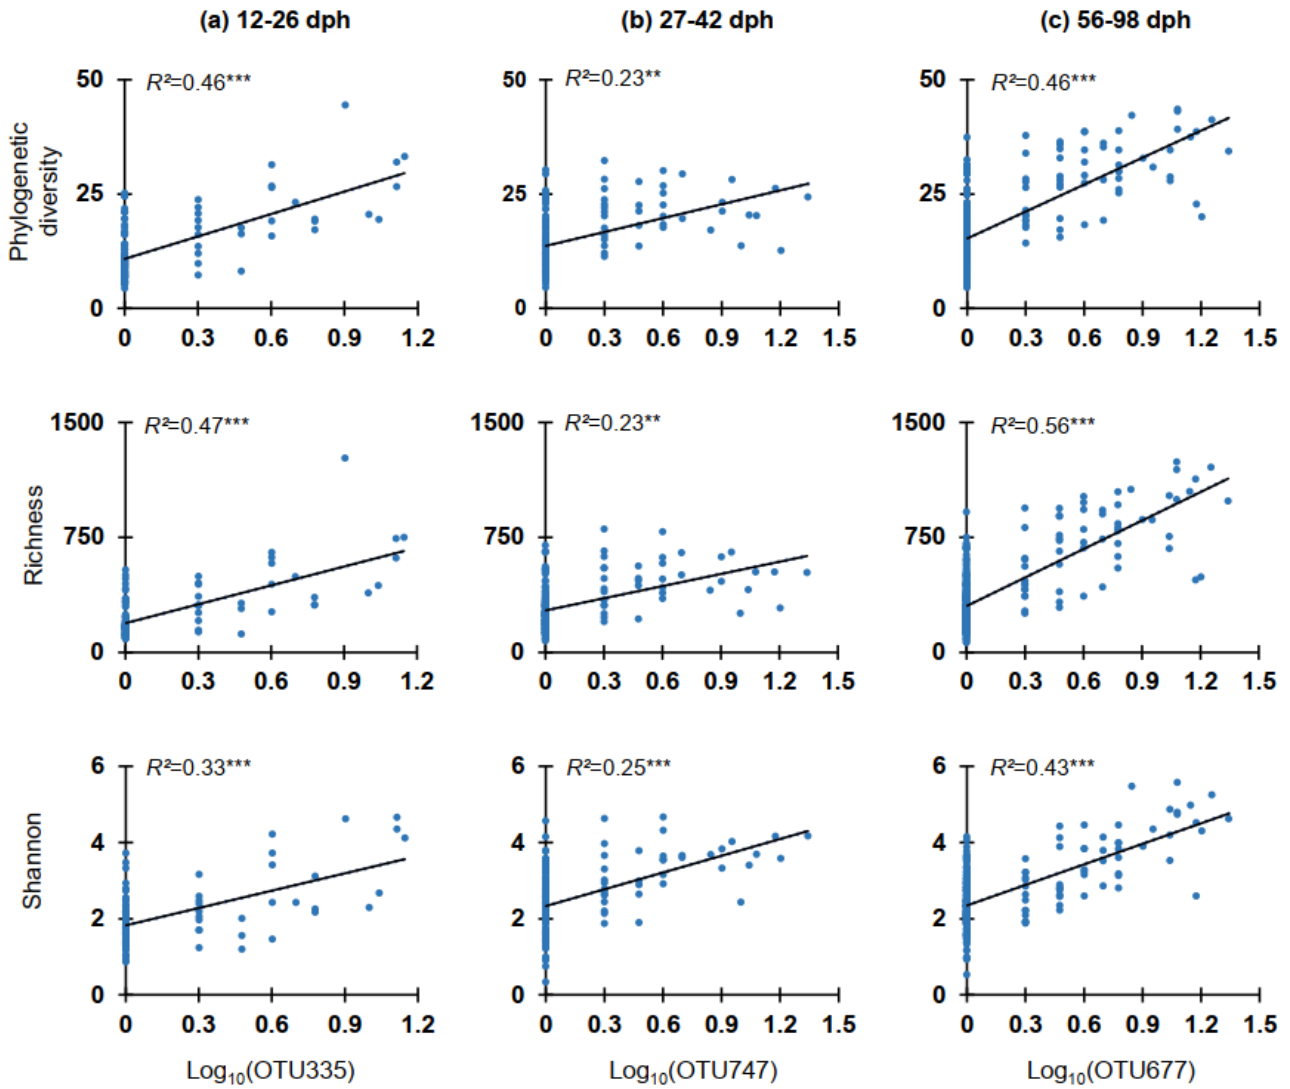

**Fig S3** Alpha-diversity of gut microbiota significantly increased as the increasing of keystone OTU's abundance. Only given a representative OTU for each developmental stage, and the asterisks indicate the statistical significance (\*\*\*)  $p < 0.001$ , and \*\*  $0.001 < p < 0.01$ ). OTU335: *Rhizobiales*; OTU747: *Legionellaceae*; OTU677: *Planctomyces*.

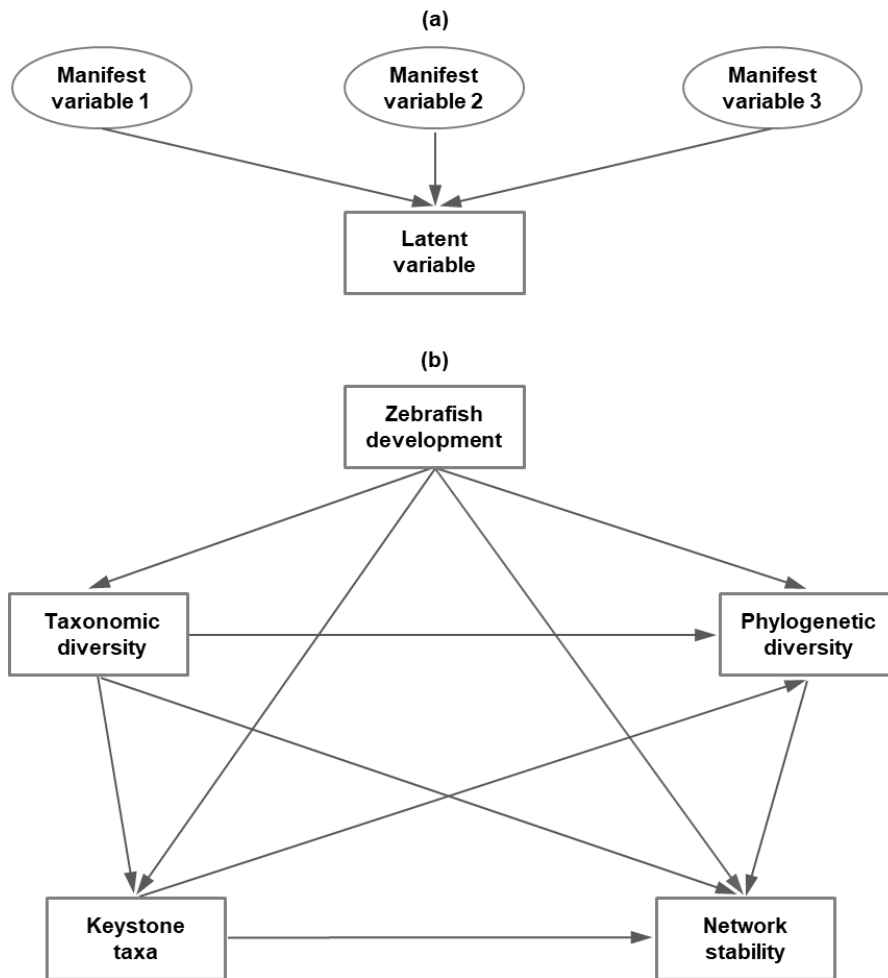

**Fig S4** A priori model identifying interrelationships among different factors. (a) A latent variable measured by formative and reflective manifest variables. Latent variables were hypothetical variables that cannot be measured directly and were taken as underlying variables that help explain the association between two or more manifest variables. (b) Path Diagram depicting our model. Zebrafish development box was reflected by stage and days post-hatching (dph); Taxonomic diversity box was reflected by Shannon and Simpson; Phylogenetic diversity box was reflected by phylogenetic distance (PD) and mean pairwise distance (MDP); Keystone taxa box was reflected by connectors and Hubs; Network stability box was reflected by positive (P) and negative cohesion (N).

**Table S1** Dissimilarity tests showing the community dissimilarities of gut microbiota across zebrafish development.

| Development                         | MRPP        |       |          |       | PERMANOVA   |       |         |       |
|-------------------------------------|-------------|-------|----------|-------|-------------|-------|---------|-------|
|                                     | Bray-Curtis |       | Jaccard  |       | Bray-Curtis |       | Jaccard |       |
|                                     | $\delta$    | $p$   | $\delta$ | $p$   | $F$         | $p$   | $F$     | $p$   |
| According to sampling points*       |             |       |          |       |             |       |         |       |
| 12 dph vs 20 dph                    | 0.551       | 0.001 | 0.782    | 0.001 | 3.498       | 0.001 | 3.122   | 0.001 |
| 20 dph vs 27 dph                    | 0.564       | 0.001 | 0.763    | 0.001 | 11.024      | 0.001 | 5.703   | 0.001 |
| 27 dph vs 42 dph                    | 0.666       | 0.001 | 0.776    | 0.001 | 17.050      | 0.001 | 6.969   | 0.001 |
| 42 dph vs 56 dph                    | 0.615       | 0.001 | 0.790    | 0.001 | 8.246       | 0.001 | 3.214   | 0.001 |
| 56 dph vs 70 dph                    | 0.485       | 0.001 | 0.787    | 0.001 | 16.676      | 0.001 | 5.358   | 0.001 |
| 70 dph vs 98 dph                    | 0.470       | 0.001 | 0.780    | 0.001 | 20.498      | 0.001 | 13.668  | 0.001 |
| According to developmental stages** |             |       |          |       |             |       |         |       |
| 12-26 vs 27-42 dph                  | 0.679       | 0.001 | 0.803    | 0.001 | 80.963      | 0.001 | 8.877   | 0.001 |
| 12-26 vs 56-98 dph                  | 0.574       | 0.001 | 0.815    | 0.001 | 24.385      | 0.001 | 17.936  | 0.001 |
| 27-42 vs 56-98 dph                  | 0.606       | 0.001 | 0.807    | 0.001 | 138.053     | 0.001 | 13.773  | 0.001 |

\* Only for those with replicates  $\geq 27$  per time. \*\* The stages were divided refer to our previous study [1]. MRPP: multi-response permutation procedure; PERMANOVA: permutational multivariate analysis of variance; dph: day post-hatching.

**Table S2** Topological properties of the constructed molecular ecological networks.

**Table S3** Taxonomy and classification of potential keystone OTUs as identified by network analysis across zebrafish development.

| OTU ID           | Average abundance | Keystone type | Phylum          | Class                    | Order              | Family              | Genus                    |
|------------------|-------------------|---------------|-----------------|--------------------------|--------------------|---------------------|--------------------------|
| <b>12-26 dph</b> | (%)               |               |                 |                          |                    |                     |                          |
| OTU91            | 0.004             | Network hubs  | Bacteroidetes   | Saprospirae              | Saprospirales      | Chitinophagaceae    | <i>Sediminibacterium</i> |
| OTU969           | 0.019             | Network hubs  | Proteobacteria  | $\alpha$ -Proteobacteria | Rickettsiales      | /                   | /                        |
| OTU307           | 0.019             | Network hubs  | Proteobacteria  | $\beta$ -Proteobacteria  | Methylophilales    | Methylophilaceae    | <i>Methylotenera</i>     |
| OTU1662          | 0.004             | Network hubs  | Proteobacteria  | $\gamma$ -Proteobacteria | Enterobacteriales  | Enterobacteriaceae  | <i>Serratia</i>          |
| OTU1204          | 0.009             | Module hubs   | Proteobacteria  | $\beta$ -Proteobacteria  | Burkholderiales    | Oxalobacteraceae    | /                        |
| OTU204           | 0.022             | Connectors    | Planctomycetes  | Planctomycetia           | Planctomycetales   | Planctomycetaceae   | <i>Planctomyces</i>      |
| OTU295           | 0.010             | Connectors    | Planctomycetes  | Planctomycetia           | Planctomycetales   | Planctomycetaceae   | <i>Planctomyces</i>      |
| OTU141*          | 0.407             | Connectors    | Proteobacteria  | $\alpha$ -Proteobacteria | Rhizobiales        | /                   | /                        |
| OTU335           | 0.007             | Connectors    | Proteobacteria  | $\alpha$ -Proteobacteria | Rhizobiales        | /                   | /                        |
| OTU6695          | 0.010             | Connectors    | Proteobacteria  | $\alpha$ -Proteobacteria | Rhizobiales        | /                   | /                        |
| OTU420           | 0.015             | Connectors    | Proteobacteria  | $\alpha$ -Proteobacteria | Rhodobacterales    | Rhodobacteraceae    | <i>Rhodobacter</i>       |
| OTU936           | 0.011             | Connectors    | Proteobacteria  | $\alpha$ -Proteobacteria | Rhodobacterales    | Rhodobacteraceae    | <i>Rhodobacter</i>       |
| OTU720           | 0.013             | Connectors    | Proteobacteria  | $\beta$ -Proteobacteria  | Burkholderiales    | Comamonadaceae      | <i>Comamonas</i>         |
| OTU303           | 0.007             | Connectors    | Proteobacteria  | $\beta$ -Proteobacteria  | SC-I-84            | /                   | /                        |
| OTU6216          | 0.003             | Connectors    | Proteobacteria  | $\gamma$ -Proteobacteria | Enterobacteriales  | Enterobacteriaceae  | <i>Plesiomonas</i>       |
| OTU6832          | 0.003             | Connectors    | Proteobacteria  | $\gamma$ -Proteobacteria | Enterobacteriales  | Enterobacteriaceae  | <i>Plesiomonas</i>       |
| OTU7086          | 0.002             | Connectors    | Proteobacteria  | $\gamma$ -Proteobacteria | Enterobacteriales  | Enterobacteriaceae  | <i>Plesiomonas</i>       |
| OTU1062          | 0.021             | Connectors    | Proteobacteria  | $\gamma$ -Proteobacteria | Legionellales      | Coxiellaceae        | <i>Aquicella</i>         |
| OTU157           | 0.014             | Connectors    | Proteobacteria  | $\gamma$ -Proteobacteria | Legionellales      | /                   | /                        |
| OTU330           | 0.010             | Connectors    | Proteobacteria  | $\gamma$ -Proteobacteria | Pseudomonadales    | Pseudomonadaceae    | <i>Pseudomonas</i>       |
| OTU380           | 0.024             | Connectors    | Proteobacteria  | $\gamma$ -Proteobacteria | Pseudomonadales    | Pseudomonadaceae    | <i>Pseudomonas</i>       |
| OTU1050          | 0.012             | Connectors    | Proteobacteria  | $\gamma$ -Proteobacteria | Pseudomonadales    | Pseudomonadaceae    | /                        |
| OTU84#           | 0.038             | Connectors    | Proteobacteria  | $\gamma$ -Proteobacteria | Vibrionales        | Vibrionaceae        | <i>Vibrio</i>            |
| OTU255           | 0.017             | Connectors    | Proteobacteria  | $\gamma$ -Proteobacteria | Vibrionales        | Vibrionaceae        | <i>Vibrio</i>            |
| OTU1504          | 0.012             | Connectors    | TM6             | SJA-4                    | /                  | /                   | /                        |
| OTU370           | 0.019             | Connectors    | Verrucomicrobia | Verrucomicrobiae         | Verrucomicrobiales | Verrucomicrobiaceae | /                        |
| OTU476#          | 0.026             | Connectors    | Verrucomicrobia | Verrucomicrobiae         | Verrucomicrobiales | Verrucomicrobiaceae | /                        |

| OTU ID           | Average abundance | Keystone type | Phylum          | Class                    | Order              | Family                 | Genus                 |
|------------------|-------------------|---------------|-----------------|--------------------------|--------------------|------------------------|-----------------------|
| <b>27-42 dph</b> | (%)               |               |                 |                          |                    |                        |                       |
| OTU52#           | 0.052             | Network hubs  | Proteobacteria  | $\alpha$ -Proteobacteria | /                  | /                      | /                     |
| OTU965           | 0.006             | Network hubs  | Proteobacteria  | $\gamma$ -Proteobacteria | Vibrionales        | Pseudoalteromonadaceae | <i>Vibrio</i>         |
| OTU1021#         | 0.005             | Module hubs   | Fusobacteria    | Fusobacteriia            | Fusobacteriales    | Fusobacteriaceae       | <i>Cetobacterium</i>  |
| OTU3089          | 0.006             | Module hubs   | Proteobacteria  | $\alpha$ -Proteobacteria | Rhizobiales        | Phyllobacteriaceae     | /                     |
| OTU992           | 0.013             | Module hubs   | Proteobacteria  | $\beta$ -Proteobacteria  | Neisseriales       | Neisseriaceae          | <i>Chitinilyticum</i> |
| OTU6951          | 0.003             | Module hubs   | Proteobacteria  | $\gamma$ -Proteobacteria | Vibrionales        | Pseudoalteromonadaceae | /                     |
| OTU7032          | 0.003             | Module hubs   | Proteobacteria  | $\gamma$ -Proteobacteria | Vibrionales        | Pseudoalteromonadaceae | /                     |
| OTU934           | 0.008             | Module hubs   | Proteobacteria  | $\gamma$ -Proteobacteria | Vibrionales        | Pseudoalteromonadaceae | <i>Vibrio</i>         |
| OTU860           | 0.008             | Connectors    | Acidobacteria   | Acidobacteria-6          | iii1-15            | /                      | /                     |
| OTU298           | 0.004             | Connectors    | Actinobacteria  | Actinobacteria           | Actinomycetales    | Mycobacteriaceae       | <i>Mycobacterium</i>  |
| OTU571#          | 0.022             | Connectors    | Bacteroidetes   | Flavobacteriia           | Flavobacteriales   | Flavobacteriaceae      | <i>Flavobacterium</i> |
| OTU119#          | 0.092             | Connectors    | Planctomycetes  | Planctomycetia           | Pirellulales       | Pirellulaceae          | /                     |
| OTU366           | 0.011             | Connectors    | Planctomycetes  | Planctomycetia           | Pirellulales       | Pirellulaceae          | /                     |
| OTU436           | 0.017             | Connectors    | Planctomycetes  | Planctomycetia           | Pirellulales       | Pirellulaceae          | /                     |
| OTU465           | 0.015             | Connectors    | Planctomycetes  | Planctomycetia           | Pirellulales       | Pirellulaceae          | /                     |
| OTU717           | 0.016             | Connectors    | Planctomycetes  | Planctomycetia           | Pirellulales       | Pirellulaceae          | /                     |
| OTU772           | 0.009             | Connectors    | Proteobacteria  | $\alpha$ -Proteobacteria | Rhizobiales        | Phyllobacteriaceae     | <i>Mesorhizobium</i>  |
| OTU451           | 0.009             | Connectors    | Proteobacteria  | $\alpha$ -Proteobacteria | Rhizobiales        | Xanthobacteraceae      | /                     |
| OTU1625          | 0.004             | Connectors    | Proteobacteria  | $\alpha$ -Proteobacteria | Rhodobacterales    | Rhodobacteraceae       | /                     |
| OTU6190          | 0.002             | Connectors    | Proteobacteria  | $\gamma$ -Proteobacteria | Enterobacteriales  | Enterobacteriaceae     | <i>Plesiomonas</i>    |
| OTU6373          | 0.003             | Connectors    | Proteobacteria  | $\gamma$ -Proteobacteria | Enterobacteriales  | Enterobacteriaceae     | <i>Plesiomonas</i>    |
| OTU7084          | 0.003             | Connectors    | Proteobacteria  | $\gamma$ -Proteobacteria | Enterobacteriales  | Enterobacteriaceae     | <i>Plesiomonas</i>    |
| OTU563           | 0.010             | Connectors    | Proteobacteria  | $\gamma$ -Proteobacteria | Legionellales      | Coxiellaceae           | /                     |
| OTU747           | 0.006             | Connectors    | Proteobacteria  | $\gamma$ -Proteobacteria | Legionellales      | Legionellaceae         | /                     |
| OTU810           | 0.010             | Connectors    | Proteobacteria  | $\gamma$ -Proteobacteria | Legionellales      | /                      | /                     |
| OTU4442          | 0.003             | Connectors    | Proteobacteria  | $\gamma$ -Proteobacteria | Vibrionales        | Pseudoalteromonadaceae | <i>Vibrio</i>         |
| OTU921           | 0.008             | Connectors    | Verrucomicrobia | Verrucomicrobiae         | Verrucomicrobiales | Verrucomicrobiaceae    | <i>Luteolibacter</i>  |

| OTU ID           | Average abundance | Keystone type | Phylum         | Class            | Order            | Family                 | Genus             |
|------------------|-------------------|---------------|----------------|------------------|------------------|------------------------|-------------------|
| <b>56-98 dph</b> | (%)               |               |                |                  |                  |                        |                   |
| OTU551#          | 0.023             | Network hubs  | Planctomycetes | Planctomycetia   | Pirellulales     | Pirellulaceae          | /                 |
| OTU7032          | 0.002             | Network hubs  | Proteobacteria | γ-Proteobacteria | Vibrionales      | Pseudoalteromonadaceae | /                 |
| OTU6121          | 0.002             | Network hubs  | Proteobacteria | γ-Proteobacteria | Vibrionales      | Pseudoalteromonadaceae | <i>Vibrio</i>     |
| OTU7075          | 0.003             | Network hubs  | Proteobacteria | γ-Proteobacteria | Vibrionales      | Pseudoalteromonadaceae | <i>Vibrio</i>     |
| OTU86#           | 0.085             | Module hubs   | Cyanobacteria  | Chloroplast      | Stramenopiles    | /                      | /                 |
| OTU579           | 0.014             | Module hubs   | Proteobacteria | α-Proteobacteria | Rhizobiales      | Methylocystaceae       | /                 |
| OTU440#          | 0.015             | Module hubs   | Proteobacteria | α-Proteobacteria | Rhizobiales      | /                      | /                 |
| OTU481#          | 0.024             | Module hubs   | Proteobacteria | α-Proteobacteria | Rhodospirillales | Acetobacteraceae       | <i>Roseomonas</i> |
| OTU491           | 0.019             | Module hubs   | Proteobacteria | γ-Proteobacteria | Legionellales    | Coxiellaceae           | /                 |
| OTU6810          | 0.003             | Module hubs   | Proteobacteria | γ-Proteobacteria | Vibrionales      | /                      | /                 |
| OTU252#          | 0.030             | Module hubs   | Proteobacteria | γ-Proteobacteria | Vibrionales      | Vibrionaceae           | <i>Vibrio</i>     |
| OTU367           | 0.022             | Connectors    | Chlamydiae     | Chlamydia        | Chlamydiales     | Parachlamydiaceae      | /                 |
| OTU963           | 0.004             | Connectors    | Nitrospirae    | Nitrospira       | Nitrospirales    | Nitrospiraceae         | <i>Nitrospira</i> |
| OTU482           | 0.008             | Connectors    | Planctomycetes | Planctomycetia   | Gemmatales       | Gemmataceae            | <i>Gemmata</i>    |
| OTU548           | 0.008             | Connectors    | Planctomycetes | Planctomycetia   | Gemmatales       | Gemmataceae            | <i>Gemmata</i>    |
| OTU578           | 0.010             | Connectors    | Planctomycetes | Planctomycetia   | Gemmatales       | Gemmataceae            | <i>Gemmata</i>    |
| OTU711           | 0.006             | Connectors    | Planctomycetes | Planctomycetia   | Gemmatales       | Gemmataceae            | <i>Gemmata</i>    |
| OTU354           | 0.019             | Connectors    | Planctomycetes | Planctomycetia   | Gemmatales       | Gemmataceae            | /                 |
| OTU424           | 0.015             | Connectors    | Planctomycetes | Planctomycetia   | Gemmatales       | Gemmataceae            | /                 |
| OTU523           | 0.009             | Connectors    | Planctomycetes | Planctomycetia   | Pirellulales     | Pirellulaceae          | <i>A17</i>        |
| OTU300           | 0.026             | Connectors    | Planctomycetes | Planctomycetia   | Pirellulales     | Pirellulaceae          | <i>Pirellula</i>  |
| OTU226#          | 0.052             | Connectors    | Planctomycetes | Planctomycetia   | Pirellulales     | Pirellulaceae          | /                 |
| OTU250#          | 0.025             | Connectors    | Planctomycetes | Planctomycetia   | Pirellulales     | Pirellulaceae          | /                 |
| OTU296           | 0.024             | Connectors    | Planctomycetes | Planctomycetia   | Pirellulales     | Pirellulaceae          | /                 |
| OTU322           | 0.024             | Connectors    | Planctomycetes | Planctomycetia   | Pirellulales     | Pirellulaceae          | /                 |
| OTU350           | 0.018             | Connectors    | Planctomycetes | Planctomycetia   | Pirellulales     | Pirellulaceae          | /                 |
| OTU542           | 0.010             | Connectors    | Planctomycetes | Planctomycetia   | Pirellulales     | Pirellulaceae          | /                 |



| OTU ID                   | Average abundance | Keystone type | Phylum          | Class                    | Order              | Family              | Genus                |
|--------------------------|-------------------|---------------|-----------------|--------------------------|--------------------|---------------------|----------------------|
| <b>56-98 dph (Cont.)</b> |                   |               |                 |                          |                    |                     |                      |
| OTU632                   | 0.007             | Connectors    | Planctomycetes  | Planctomycetia           | Pirellulales       | Pirellulaceae       | /                    |
| OTU687                   | 0.006             | Connectors    | Planctomycetes  | Planctomycetia           | Pirellulales       | Pirellulaceae       | /                    |
| OTU366                   | 0.013             | Connectors    | Planctomycetes  | Planctomycetia           | Pirellulales       | Pirellulaceae       | /                    |
| OTU677                   | 0.007             | Connectors    | Planctomycetes  | Planctomycetia           | Planctomycetales   | Planctomycetaceae   | <i>Planctomyces</i>  |
| OTU685                   | 0.008             | Connectors    | Planctomycetes  | Planctomycetia           | Planctomycetales   | Planctomycetaceae   | <i>Planctomyces</i>  |
| OTU857                   | 0.004             | Connectors    | Planctomycetes  | Planctomycetia           | Planctomycetales   | Planctomycetaceae   | <i>Planctomyces</i>  |
| OTU988                   | 0.005             | Connectors    | Planctomycetes  | Planctomycetia           | Planctomycetales   | Planctomycetaceae   | <i>Planctomyces</i>  |
| OTU295                   | 0.012             | Connectors    | Planctomycetes  | Planctomycetia           | Planctomycetales   | Planctomycetaceae   | <i>Planctomyces</i>  |
| OTU947                   | 0.005             | Connectors    | Proteobacteria  | $\alpha$ -Proteobacteria | Rhizobiales        | Rhizobiaceae        | <i>Agrobacterium</i> |
| OTU1938                  | 0.007             | Connectors    | Proteobacteria  | $\alpha$ -Proteobacteria | Rhizobiales        | /                   | /                    |
| OTU858                   | 0.006             | Connectors    | Proteobacteria  | $\alpha$ -Proteobacteria | Rhizobiales        | /                   | /                    |
| OTU994                   | 0.008             | Connectors    | Proteobacteria  | $\alpha$ -Proteobacteria | Rhodobacterales    | Rhodobacteraceae    | <i>Rhodobacter</i>   |
| OTU6860                  | 0.002             | Connectors    | Proteobacteria  | $\alpha$ -Proteobacteria | Rhodospirillales   | Rhodospirillaceae   | <i>Reyranella</i>    |
| OTU2731                  | 0.005             | Connectors    | Proteobacteria  | $\beta$ -Proteobacteria  | SC-I-84            | /                   | /                    |
| OTU942                   | 0.007             | Connectors    | Proteobacteria  | $\beta$ -Proteobacteria  | SC-I-84            | /                   | /                    |
| OTU6151                  | 0.003             | Connectors    | Proteobacteria  | $\gamma$ -Proteobacteria | Enterobacteriales  | Enterobacteriaceae  | <i>Plesiomonas</i>   |
| OTU6453                  | 0.002             | Connectors    | Proteobacteria  | $\gamma$ -Proteobacteria | Enterobacteriales  | Enterobacteriaceae  | <i>Plesiomonas</i>   |
| OTU6913                  | 0.002             | Connectors    | Proteobacteria  | $\gamma$ -Proteobacteria | Enterobacteriales  | Enterobacteriaceae  | <i>Plesiomonas</i>   |
| OTU6916                  | 0.002             | Connectors    | Proteobacteria  | $\gamma$ -Proteobacteria | Enterobacteriales  | Enterobacteriaceae  | <i>Plesiomonas</i>   |
| OTU6216                  | 0.002             | Connectors    | Proteobacteria  | $\gamma$ -Proteobacteria | Enterobacteriales  | Enterobacteriaceae  | <i>Plesiomonas</i>   |
| OTU770                   | 0.008             | Connectors    | Proteobacteria  | $\gamma$ -Proteobacteria | Legionellales      | Coxiellaceae        | /                    |
| OTU526                   | 0.007             | Connectors    | Proteobacteria  | $\gamma$ -Proteobacteria | Oceanospirillales  | Halomonadaceae      | <i>Halomonas</i>     |
| OTU390                   | 0.014             | Connectors    | TM6             | SJA-4                    | /                  | /                   | /                    |
| OTU468                   | 0.014             | Connectors    | TM6             | SJA-4                    | /                  | /                   | /                    |
| OTU638                   | 0.007             | Connectors    | Verrucomicrobia | Opitutae                 | Cerasicoccales     | Cerasicoccaceae     | /                    |
| OTU765                   | 0.009             | Connectors    | Verrucomicrobia | Verrucomicrobiae         | Verrucomicrobiales | Verrucomicrobiaceae | <i>Luteolibacter</i> |

Abundant OTU (\*), neither abundant nor rare OTU (#), rare OTU (no marks), and “/” indicated unclassified at this classification level.

## REFERENCE

1. Xiao F, Zhu W, Yu Y, He Z, Wu B, Wang C, Shu L, Li X, Yin H, Wang J, Juneau P, Zheng X, Wu Y, Li J, Chen X, Hou D, Huang Z, He J, Xu G, Xie L, Huang J, Yan Q. 2021. Host development overwhelms environmental dispersal in governing the ecological succession of zebrafish gut microbiota. *npj Biofilms Microbiomes* 7:5. <https://doi.org/10.1038/s41522-020-00176-2>.
